# Supplementary material
Source: PubMed Central journal article supplement (PMC5942555)
Supplement: NIHMS850898-supplement-Supplementary_Materials.pdf [file NIHMS850898-supplement-Supplementary_Materials.pdf]

## SUPPORTING INFORMATION

# Identification of Biomarkers of exposure to FTOHs and PAPs in Humans using a targeted and non-targeted analysis approach

*Sonia Dagnino<sup>1, 2\*</sup>, Mark J. Strynar<sup>1\*</sup>, Rebecca L. McMahan<sup>1, 2</sup>, Christopher S. Lau<sup>3</sup>, Carol Ball<sup>4</sup>, Stavros Garantziotis<sup>5</sup>, Thomas F. Webster<sup>6</sup>, Michael D. McClean<sup>6</sup>, Andrew B. Lindstrom<sup>1</sup>.*

<sup>1</sup> U.S. Environmental Protection Agency, National Exposure Research Laboratory, Research Triangle Park, North Carolina 27711, USA.

<sup>2</sup> Oak Ridge Associated Universities, ORISE Program, Oak Ridge, Tennessee 37831, USA.

<sup>3</sup> U.S. Environmental Protection Agency, National Health and Environmental Effects Research Laboratory, Research Triangle Park, North Carolina 27711, USA.

<sup>4</sup> Agilent Technologies, Inc., 13000 Weston Parkway, Cary, North Carolina, 27510, USA.

<sup>5</sup> Clinical Research Program and Laboratory of Respiratory Biology, National Institute of Environmental Health Sciences, Research Triangle Park, North Carolina 27709, USA

<sup>6</sup> Department of Environmental Health, Boston University School of Public Health, 715 Albany Street, T4W, Boston, Massachusetts 02118, USA.

### Contents

|                                                                                                                                                                                          |    |
|------------------------------------------------------------------------------------------------------------------------------------------------------------------------------------------|----|
| Experimental.....                                                                                                                                                                        | 2  |
| Chemicals.....                                                                                                                                                                           | 2  |
| Animal treatment.....                                                                                                                                                                    | 2  |
| Dosed animals serum, urine and feces.....                                                                                                                                                | 3  |
| Human serum and urine .....                                                                                                                                                              | 4  |
| Quality assurance and control .....                                                                                                                                                      | 5  |
| Tables.....                                                                                                                                                                              | 5  |
| Table S.1. Database of known metabolites and transformation products of the 8:2 FTOH and 8:2 diPAP. ....                                                                                 | 6  |
| Table S.2. Descriptive demographics of studied population .....                                                                                                                          | 7  |
| Table S.3. (A, B and C). Summary of instrumental parameters for LC-MS-TOF .....                                                                                                          | 8  |
| Table S3 Limits of quantification (LOQ) and recoveries ( $\pm$ SD) of analytes in rat serum and urine.....                                                                               | 9  |
| Table S4 Limits of quantification (LOQ) and recoveries % ( $\pm$ SD) of analytes in human serum and urine .....                                                                          | 10 |
| Table S.5: Results of p-values for Shapiro-Wilk normality test. ....                                                                                                                     | 11 |
| Table S.6: P-Values from Mann-Whitney U test .....                                                                                                                                       | 12 |
| Figures .....                                                                                                                                                                            | 13 |
| Figure S.1 : Expected biotransformation pathway of 8:2,8:2 diPAP and 8:2 FTOH .....                                                                                                      | 13 |
| Figure S.2 Metabolites of 8:2 FTOH in serum .....                                                                                                                                        | 14 |
| Figure S.3. Mass profiler of 8:2 diPAP dosed animal serum.....                                                                                                                           | 15 |
| Figure S.4. Feces analysis .....                                                                                                                                                         | 17 |
| Figure S.5. Plots for Spearman correlation of analysis of selected compounds in the office workers from the present study and the analysis from previous work (Fraser et al. 2012). .... | 18 |
| Figure S.6 8:2 FTOH sulfate in human serum .....                                                                                                                                         | 19 |
| Figure S.7 Extracted Ion Chromatogram for FTOH Sulfate in blanks and standard curve points. ....                                                                                         | 20 |
| References .....                                                                                                                                                                         | 21 |

## Experimental

### Chemicals

Potassium perfluorobutane sulfonate (PFBS), Potassium perfluorohexane sulfonate (PFHxS) and potassium salt (PFOS), Perfluorohexanoic acid (C6), perfluoroheptanoic acid (C7), PFOA, perfluorononanoic acid (C9), and perfluorodecanoic acid (C10), perfluoroundecanoic acid (C11), perfluorododecanoic acid (C12), perfluoro (C13), perfluoro (C14), 8:2 fluorotelomer alcohol (8:2 FTOH), 6:2, 8:2, 10:2 fluorotelomer acid (6:2, 8:2 and 10:2 FTCA), 5:3 and 7:3 unsaturated acids (5:3 Acid, 7:3 Acid), 6:2 and 8:2 mono- polyfluoroalkyl phosphate ester (6:2 and 8:2 mono-PAP), 6:2, 6:2 di-polyfluoroalkyl phosphate ester (6:2, 6:2 diPAP), were purchased from Wellington laboratories (Ontario, Canada). 8:2, 8:2 di-polyfluoroalkyl phosphate ester (8:2, 8:2 diPAP) was purchased from Synquest Laboratories. 8:2 FTOH-Sulfate was custom synthesized and purchased by Toronto Research Chemicals. Five stable, isotopically labeled internal standards (ISs) were used to quantitate PFASs. Isotopically labeled PFBA ( $^{13}\text{C}_4\text{HF}_7\text{O}_2$ ), PFHxA ( $^{13}\text{C}_2^{12}\text{C}_4\text{HF}_{11}\text{O}_2$ ), PFOA ( $^{13}\text{C}_2^{12}\text{C}_6\text{HF}_{15}\text{O}_2$ ), PFNA ( $^{13}\text{C}_5^{12}\text{C}_4\text{HF}_{17}\text{O}_2$ ), PFDA ( $^{13}\text{C}_2^{12}\text{C}_8\text{HF}_{19}\text{O}_2$ ), PFUnA ( $^{13}\text{C}_2^{12}\text{C}_9\text{HF}_{21}\text{O}_2$ ), 8:2 FTOH ( $^{13}\text{C}_2^{12}\text{C}_8\text{H}_2\text{H}_3\text{F}_{17}\text{O}$ ), 8:2-8:2 diPAP ( $^{13}\text{C}_4^{12}\text{C}_{16}\text{H}_8\text{F}_{34}\text{PO}_4\text{Na}$ ), 8:2 FTCA ( $^{13}\text{C}_2^{12}\text{C}_8\text{H}_3\text{F}_{17}\text{O}_2$ ), Oxygen-labeled ammonium PFOS ( $\text{C}_8\text{F}_{17}\text{S}_{18}\text{O}_2^{16}\text{ONa}$ ), , oxygen labeled sodium PFHxS ( $\text{C}_6\text{F}_{13}\text{S}_{18}\text{O}_2^{16}\text{ONa}$ ), were purchased from Wellington Laboratories (Ontario, Canada). GIBCO newborn calf serum was purchased from Invitrogen (Carlsbad, CA). Deionized (DI) water was obtained from a Barnstead EASYpure ultraviolet/ultrafiltration (UV/UF) compact reagent-grade water system (Dubuque, IA). Methanol was purchased from Fisher Scientific (Fairlawn, NJ). Ammonium acetate and formate were obtained from Sigma-Aldrich Chemical (St Louis, MO).

### Animal treatment

All procedures involving the use of laboratory animals were conducted in accordance to the guidelines set forth by the U.S. EPA ORD/NHEERL Institutional Animal Care and Use Committee. Animal care procedures and facilities (AAALAC accredited) were consistent with the recommendations provided by the 1996 National Research Council's "Guide for the Care and Use of Laboratory Animals", the Animal Welfare Act, and the Public Health Service Policy on the Humane Care and Use of Laboratory Animals. Animal facility was set to maintain a mean temperature of 20–24°C, relative humidity of 40–60%, and kept under a 12-h light–dark cycle (lights off 7:00 p.m.–7:00 a.m.). Sprague–Dawley rats (10–12 weeks old, 200–250 g) were purchased from Charles River Laboratory (Raleigh, NC). Upon arrival, animals were housed

individually in polycarbonate, metabolic cages. Food (Harlan Teklad Diet (Madison, WI) and tap water were provided *ad libitum*. All animals were allowed one week to acclimate to their environment prior to the beginning of the study. Non-fasted male rats (n = 3 per dose group and n=1 for control, total n=13) were given a single dose by oral gavage of 8:2 FTOH or 8:2 di-PAP at 5 or 50 mg/kg body weight, at a volume of 1ml/kg. Blood samples (approximately 500µL) were collected from the tail vein at 8, 24, 48, 72, 96, 120 hours after dosing. Serum samples were prepared after blood clotting and centrifugation at 2000 x g for 30 min, and stored at -70 °C until analysis. Urine and feces were collected at the same time points and stored at -70 °C until analysis.

### **Dosed animals serum, urine and feces**

For quantitation, dosed animals serum and urine were prepared using a simplified preparation technique from a previously described method used for rodents<sup>1</sup>. Briefly, serum and urine samples were thawed and vortexed, 50 µL or 100 µL subsample (for serum and urine respectively) were placed in 2 mL polypropylene micro centrifuge tube. A volume of 100 µL of ice cold acetonitrile containing each isotopically labeled IS at 25 pg/µL or 100 pg/µL was added (giving a final IS concentration of 50 ng/mL in serum or urine). Samples were vortexed and centrifuged for 10 minutes at 1800 g to separate the precipitated proteins, and the supernatants were transferred to autosampler vials and adjusted to a final concentration of 50% acetonitrile extract and 50 % 10mM ammonium acetate aqueous buffer to approximate initial LC conditions. All analytes were spiked into newborn calf serum or previously tested PFASs free blank human urine and prepared as described above to make a 9 to 12 points calibration curve ranging from 5 ng/mL to 2000 ng/mL for serum and 5 ng/mL to 1000 ng/mL for urine. Analytes were quantified by regressing the relative response of the unknown over the most appropriate IS against concentration. Feces were weighted, and an aliquot of 0.1 to 0.5 g was used for extraction. Feces were dissolved in 2mL of acetonitrile containing isotopically labeled IS at 25 pg/µL. The dissolved extract was then sonicated for 30min and subsequently centrifuged at 1800g for 5 minutes. A 500 uL aliquot of the supernatant was filtered with a 0.45 µm filtration vial, the filtrate was then stored for analysis. All analytes were spiked into control rat feces previously tested as PFASs free and prepared as described above to make a 9 to 12 points calibration curve ranging from 5 ng/g to 3000 ng/g of feces. Limits of quantitation and recoveries for rat's serum, urine and feces are available on SI Table S.3.

For the analysis of unknown metabolites, dosed animals serum and urine were prepared by solid phase extraction. An aliquot of 25 µL of each time point (serum or urine) was taken and pooled

together for each animal, resulting in a 150  $\mu\text{L}$  aliquot of serum/animal. Sample was diluted in 1 mL of DI water and spiked with internal standard solution (7.5 ng/sample). SPE was carried on an OASIS HLB 3cc, conditioned with 2mL of methanol with 0.1 % ammonium hydroxyde, 2mL of methanol and 2 mL of DI water prior to loading samples. Cartridges were then washed with 2mL of DI water and 2 mL of a DI water and methanol mixture (50:50) and eluted with 2mL of methanol with 0.1 % ammonium hydroxyde. Eluates were blown down to 100  $\mu\text{L}$  under a gentle stream of nitrogen and stored for analysis.

### **Human serum and urine**

Human serum and urine were prepared by solid phase extraction using an OASIS WAX, Waters cartridge. A volume of 500  $\mu\text{L}$  of serum or 15mL of urine was mixed with 200  $\mu\text{L}$  of formic acid at 0.1mM containing each isotopically labeled IS at 62.5 pg/ $\mu\text{L}$  for serum and 0.2 pg/ $\mu\text{L}$  for urine (giving a final IS concentration of 50 ng/mL in serum and 10 ng/mL in urine). A volume of 2.5 mL of acetonitrile was added to the serum for protein precipitation. Serum and urine were centrifuged for 10 minutes at 1800 g, and supernatant was transferred to a new vial. Serum supernatant was diluted up to 15 mL with DI Water. Solid phase extraction was conducted on an OASIS wax cartridge 3cc for serum and an OASIS wax plus 6cc for urine. Cartridges were conditioned subsequentially with a mixture of methanol and ammonium hydroxyde at 0.1%, methanol and DI water. Samples were loaded to the cartridge; cartridges were then dried under vacuum for 5 minutes. Elution was performed with methanol and ammonium hydroxide at 0.1% and extract were evaporated under a gentle stream of nitrogen down to a volume of 150  $\mu\text{L}$ . Extracts were transferred to an autosampler vials and adjusted to a final concentration of 50% acetonitrile extract and 50 % 10mM ammonium acetate aqueous buffer to approximate initial LC conditions. All analytes were spiked into newborn calf serum or previously tested PFASs free blank human urine and prepared as described above to make an 8 or 5 point calibration curve ranging from 0.01 ng/mL to 50 ng/mL for serum and 0.1 ng/L to 50 ng/L for urine. Analytes were quantified by regressing the relative response of the unknown over the most appropriate IS against concentration. Limits of quantitation and recoveries for human serum and urine are available on SI Table S.4.

**Quality assurance and control**

Analysis were separated in batches, for each batch method and matrix blanks were analyzed for contamination or background levels for the studied compounds. The limit of quantitation (LOQ) was determined as the concentration of the lowest working standard which back-predicted within 30% of a theoretical value. 10% of randomly selected samples were replicated in each quantitative experiment to ensure consistency within the dataset. Quality control at high and low concentration (QC) containing the mixture of measured compounds described in materials and methods were run with each batch of human serum to ensure analytical precision and accuracy.

**Table S.1. Database of known metabolites and transformation products of the 8:2 FTOH and 8:2 diPAP.**

(This table is based on the following work <sup>1-4</sup>). Lines highlighted in grey indicate compounds with available standards for confirmation.

| Compound                                                              | Elemental composition                                                           | Abbreviation                                                 | Monoisotopic Mass |
|-----------------------------------------------------------------------|---------------------------------------------------------------------------------|--------------------------------------------------------------|-------------------|
| PFOA                                                                  | C8H <sub>2</sub> O <sub>2</sub> F <sub>15</sub>                                 | Perfluorooctanoic acid                                       | 413.9737          |
| PFNA                                                                  | C <sub>9</sub> H <sub>2</sub> O <sub>2</sub> F <sub>17</sub>                    | Perfluorononanoic acid                                       | 463.9705          |
| 8:2 FTOH                                                              | C <sub>10</sub> H <sub>5</sub> F <sub>17</sub> O                                | 8:2 Fluorotelomer alcohol                                    | 464.0068          |
| 8:2 monoPAP                                                           | C <sub>10</sub> H <sub>6</sub> O <sub>4</sub> PF <sub>17</sub>                  | 8:2 mono phosphate ester                                     | 543.9732          |
| 8:2-8:2-diPAP                                                         | C <sub>20</sub> H <sub>9</sub> O <sub>4</sub> PF <sub>34</sub>                  | 8:2-8:2 di phosphate ester                                   | 989.9696          |
| 8:2 FTUCA                                                             | C <sub>10</sub> H <sub>2</sub> O <sub>2</sub> F <sub>16</sub>                   | 8:2 fluorotelomer unsaturated acid                           | 457.9799          |
| 8:2 FTAL                                                              | C <sub>10</sub> H <sub>3</sub> F <sub>17</sub> O                                | 8:2 Fluorotelomer aldehyde                                   | 461.9912          |
| GLUT-FTUAL                                                            | C <sub>20</sub> H <sub>18</sub> F <sub>15</sub> N <sub>3</sub> O <sub>7</sub> S | 8:2 Fluorotelomer unsaturated aldehyde Glutathione conjugate | 729.0626          |
| GLUTAHTIONE-FTUCA                                                     | C <sub>20</sub> H <sub>18</sub> F <sub>15</sub> N <sub>3</sub> O <sub>8</sub> S | 8:2 Fluorotelomer unsaturated acid Glutathione conjugate     | 745.0575          |
| DHPFCA                                                                | C <sub>10</sub> H <sub>3</sub> F <sub>15</sub> O <sub>2</sub>                   | Dihydroperfluoroalkyl carboxylate                            | 493.9894          |
| THPFCA                                                                | C <sub>10</sub> H <sub>5</sub> F <sub>15</sub> O <sub>2</sub>                   | Tetrahydroperfluoroalkyl carboxylate                         | 442.005           |
| 8:2 FTCA                                                              | C <sub>10</sub> H <sub>3</sub> O <sub>2</sub> F <sub>17</sub>                   | 8:2 fluorotelomer saturated acid                             | 477.9862          |
| 7-3 UA                                                                | C <sub>10</sub> H <sub>3</sub> F <sub>15</sub> O <sub>2</sub>                   | 7:3 Fluorotelomer Unsaturated acid                           | 439.9893          |
| 7-3 Acid                                                              | C <sub>10</sub> H <sub>5</sub> F <sub>15</sub> O <sub>2</sub>                   | 7:3 Fluorotelomer acid                                       | 442.005           |
| 7-3 Acid T-A                                                          | C <sub>12</sub> H <sub>10</sub> F <sub>15</sub> N <sub>4</sub> S                | 7:3 Acid taurine amide                                       | 549.009           |
| 7-3 UAL                                                               | C <sub>10</sub> H <sub>3</sub> F <sub>15</sub> O                                | 7:3 Unsaturated acid                                         | 423.9944          |
| 7-3 AL                                                                | C <sub>10</sub> H <sub>5</sub> F <sub>15</sub> O                                | 7:3 Aldehyde                                                 | 426.0101          |
| 7-3 BETA-OH UAL                                                       | C <sub>10</sub> H <sub>3</sub> F <sub>15</sub> O <sub>2</sub>                   | 7:3 β-hydroxy unsaturated aldehyde                           | 439.9893          |
| 7-3 BETA-OH UA                                                        | C <sub>10</sub> H <sub>3</sub> F <sub>15</sub> O <sub>3</sub>                   | 7:3 β-hydroxy unsaturated acid                               | 455.9842          |
| 7-3 BETA-KETO ACID                                                    | C <sub>10</sub> H <sub>3</sub> F <sub>15</sub> O <sub>3</sub>                   | 7:3 β keto acid                                              | 455.9842          |
| 7-32KETONE                                                            | C <sub>10</sub> H <sub>3</sub> F <sub>15</sub> O <sub>2</sub>                   | Perfluoroheptyl methyl ketone                                | 439.9893          |
| 7-2 sFTOH-Gluc                                                        | C <sub>15</sub> H <sub>13</sub> F <sub>15</sub> O <sub>7</sub>                  | 7:2 Secondary Fluorotelomer alcohol glucuronide conjugate    | 590.0421          |
| 7-2 sFTOH                                                             | C <sub>10</sub> H <sub>5</sub> F <sub>15</sub> O                                | 7:2 Secondary Fluorotelomer alcohol                          | 414.01            |
| F(CF <sub>2</sub> ) <sub>7</sub> -C(GSH)=CH-CH <sub>2</sub> OH        | C <sub>19</sub> H <sub>1</sub> F <sub>15</sub> N <sub>3</sub> O <sub>7</sub> S  | 8:2 Fluorotelomer unsaturated alcohol glutathione            | 717.0625          |
| F(CF <sub>2</sub> ) <sub>7</sub> -C(GSH)=CH-CO <sub>2</sub> H         | C <sub>19</sub> H <sub>16</sub> F <sub>15</sub> N <sub>3</sub> O <sub>8</sub> S | 8:2 Fluorotelomer unsaturated acid glutathione               | 731.0418          |
| F(CF <sub>2</sub> ) <sub>7</sub> -C(SCysGly)=CH-CH <sub>2</sub> OH    | C <sub>14</sub> H <sub>10</sub> F <sub>15</sub> N <sub>4</sub> S                | 8:2 Fluorotelomer unsaturated alcohol cysteinylglycine       | 573.009           |
| F(CF <sub>2</sub> ) <sub>7</sub> -C(SCysGly)=CH-CO <sub>2</sub> H     | C <sub>14</sub> H <sub>8</sub> F <sub>15</sub> N <sub>4</sub> O <sub>5</sub> S  | 8:2 Fluorotelomer unsaturated acid cysteinylglycine          | 586.9883          |
| F(CF <sub>2</sub> ) <sub>7</sub> -C(SCys)=CH-CH <sub>2</sub> OH       | C <sub>13</sub> H <sub>10</sub> F <sub>15</sub> N <sub>3</sub> O <sub>3</sub> S | 8:2 Fluorotelomer unsaturated alcohol cysteine               | 545.0141          |
| F(CF <sub>2</sub> ) <sub>7</sub> -C(SCys)=CH-CO <sub>2</sub> H        | C <sub>13</sub> H <sub>8</sub> F <sub>15</sub> N <sub>3</sub> O <sub>4</sub> S  | 8:2 Fluorotelomer unsaturated acid cysteine                  | 558.9934          |
| F(CF <sub>2</sub> ) <sub>7</sub> -C(SCyNAcetyl)=CH-CH <sub>2</sub> OH | C <sub>15</sub> H <sub>12</sub> F <sub>15</sub> N <sub>4</sub> O <sub>4</sub> S | 8:2 Fluorotelomer unsaturated alcohol N-acetylcysteine       | 587.0247          |
| F(CF <sub>2</sub> ) <sub>7</sub> -C(SCyNAcetyl)=CH-CO <sub>2</sub> H  | C <sub>15</sub> H <sub>10</sub> F <sub>15</sub> N <sub>4</sub> O <sub>5</sub> S | 8:2 Fluorotelomer unsaturated acid N-acetylcysteine          | 601.004           |
| F(CF <sub>2</sub> ) <sub>7</sub> -C(SH)=CH-CH <sub>2</sub> OH         | C <sub>10</sub> H <sub>5</sub> F <sub>15</sub> O <sub>3</sub> S                 | 8:2 Fluorotelomer unsaturated alcohol 3-thiol                | 457.9821          |
| F(CF <sub>2</sub> ) <sub>7</sub> -C(SH)=CH-CO <sub>2</sub> H          | C <sub>10</sub> H <sub>3</sub> F <sub>15</sub> O <sub>2</sub> S                 | 8:2 Fluorotelomer unsaturated acid 3-thiol                   | 471.9614          |
| 8:2 FTOH Glucuronide                                                  | C <sub>16</sub> H <sub>13</sub> F <sub>17</sub> O <sub>7</sub>                  | 8:2 Fluorotelomer alcohol glucuronide conjugate              | 640.0389          |
| 8:2 FTOH Sulfate                                                      | C <sub>10</sub> H <sub>5</sub> F <sub>17</sub> O <sub>4</sub> S                 | 8:2 Fluorotelomer alcohol sulfate conjugate                  | 543.9637          |

**Table S.2. Descriptive demographics of studied population**

**a. Gender distribution**

| <b>General population (%)</b> |             | <b>Office workers (%)</b> |              |
|-------------------------------|-------------|---------------------------|--------------|
| <b>Female</b>                 | <b>Male</b> | <b>Female</b>             | <b>Males</b> |
| 70                            | 30          | 86                        | 13           |

**b. Age distribution**

GENERAL POPULATION

| <b>Group of age (years)</b> | <b>%</b> |
|-----------------------------|----------|
| 12-19                       | 2        |
| 20-39                       | 38       |
| 40-59                       | 47       |
| 60 and older                | 13       |

OFFICE WORKERS

| <b>Group of age (years)</b> | <b>%</b> |
|-----------------------------|----------|
| 12-19                       | 0        |
| 20-39                       | 40       |
| 40-59                       | 40       |
| 60 and older                | 20       |

Table S.3. (A, B and C). Summary of instrumental parameters for LC-MS-TOF

**A. HPLC Parameters**

| <b>Agilent LC-1100 parameters</b> |                                                                                                             |
|-----------------------------------|-------------------------------------------------------------------------------------------------------------|
| <b>Column</b>                     | Agilent Eclipse Plus C18 column (2.1 mmx 50 m, 3.5 µm)                                                      |
| <b>Flow Rate</b>                  | 200 µL/min                                                                                                  |
| <b>Column Temperature</b>         | 25 °C                                                                                                       |
| <b>Injection Volume</b>           | 40 µL                                                                                                       |
| <b>Solvents</b>                   | A : 0.4 mM ammonium formate, 95:5 DI water :Methanol<br>B: 0.4 mM ammonium formate, 95:5 Methanol :DI water |

**B. Liquid chromatography gradient methods:**

**Method 1:**

| Time      | A % | B%  |
|-----------|-----|-----|
| <b>0</b>  | 50  | 50  |
| <b>5</b>  | 0   | 100 |
| <b>10</b> | 0   | 100 |
| <b>11</b> | 50  | 50  |
| <b>20</b> | 50  | 50  |

**Method 2:**

| Time      | A % | B%  |
|-----------|-----|-----|
| <b>0</b>  | 50  | 50  |
| <b>20</b> | 0   | 100 |
| <b>30</b> | 0   | 100 |
| <b>35</b> | 50  | 50  |
| <b>36</b> | 50  | 50  |

**C. MS-TOF Parameters**

| <b>Agilent 6200 MS-TOF Instrument parameters</b> |          |
|--------------------------------------------------|----------|
| <b>Gas temperature</b>                           | 350 °C   |
| <b>Drying gas flow ratw</b>                      | 10 L/min |
| <b>Nebulizer pressure</b>                        | 30 psi   |
| <b>Capillary</b>                                 | 3500 V   |
| <b>Fragmentor</b>                                | 80 V     |
| <b>Skimmer</b>                                   | 65 V     |
| <b>Octopole radio frequency</b>                  | 250 V    |



**Table S3 Limits of quantification (LOQ) and recoveries ( $\pm$ SD) of analytes in rat serum and urine**

| <b>Analyte</b>   | <b>LOQ in rat serum<br/>ng/mL</b> | <b>LOQ in rat urine<br/>ng/L</b> | <b>LOQ in rat urine<br/>ng/g</b> | <b>Recoveries<br/>in rat serum</b> | <b>Recoveries<br/>in rat urine</b> | <b>Recoveries<br/>in rat feces</b> |
|------------------|-----------------------------------|----------------------------------|----------------------------------|------------------------------------|------------------------------------|------------------------------------|
| PFOA             | 0.1                               | 0.1                              | 50                               | 108% ( $\pm$ 24%)                  | 70 % ( $\pm$ 6%)                   | 102% ( $\pm$ 13%)                  |
| PFNA             | 0.1                               | 0.1                              | 50                               | 102% ( $\pm$ 17%)                  | 94% ( $\pm$ 8%)                    | 103% ( $\pm$ 11%)                  |
| 8:2 FTOH         | 5                                 | 10                               | 50                               | 107% ( $\pm$ 25%)                  | 74% ( $\pm$ 13%)                   | 120% ( $\pm$ 15%)                  |
| 8:2PAP           | 0.1                               | 1                                | 250                              | 115% ( $\pm$ 25%)                  | 93% ( $\pm$ 13%)                   | 112% ( $\pm$ 6%)                   |
| 8:2-8:2-diPAP    | 0.1                               | 1                                | 50                               | 92% ( $\pm$ 25%)                   | 102% ( $\pm$ 37%)                  | 89% ( $\pm$ 15%)                   |
| 8:2 FTCA         | 1                                 | 5                                | 250                              | 108% ( $\pm$ 19%)                  | 89% ( $\pm$ 15%)                   | 95% ( $\pm$ 10%)                   |
| 8:2 FTOH-Sulfate | 0.5                               | 0.1                              | 250                              | 103% ( $\pm$ 12%)                  | 76% ( $\pm$ 10%)                   | 112% ( $\pm$ 6%)                   |

**Table S4 Limits of quantification (LOQ) and recoveries % ( $\pm$ SD) of analytes in human serum and urine**

| Analyte          | LOQ in human serum ng/mL | LOQ in human urine ng/L | Recoveries in human serum | Recoveries in human urine |
|------------------|--------------------------|-------------------------|---------------------------|---------------------------|
| PFBA             | 1                        | na                      | 77 % ( $\pm$ 4%)          | 73 % ( $\pm$ 35%)         |
| PFPeA            | 0.1                      | 5                       | 87% ( $\pm$ 3%)           | 98% ( $\pm$ 17%)          |
| PFHxA            | 0.05                     | 5                       | 85% ( $\pm$ 8%)           | 101% ( $\pm$ 22%)         |
| PFHpA            | 0.01                     | 5                       | 80% ( $\pm$ 9%)           | 109% ( $\pm$ 23%)         |
| PFOA             | 0.1                      | 1                       | 85% ( $\pm$ 9%)           | 99% ( $\pm$ 21%)          |
| PFNA             | 0.5                      | 5                       | 86% ( $\pm$ 11%)          | 108% (30 $\pm$ %)         |
| PFDA             | 0.05                     | 10                      | 91% ( $\pm$ 17%)          | 105% ( $\pm$ 28%)         |
| PFUnA            | 0.05                     | 10                      | 93% ( $\pm$ 21%)          | 89% ( $\pm$ 19%)          |
| PFDoA            | 0.1                      | 10                      | 95% ( $\pm$ 19%)          | 69% ( $\pm$ 7%)           |
| PFTriA           | 0.05                     | 10                      | 95% ( $\pm$ 17%)          | 40% ( $\pm$ 3%)           |
| PFTetA           | 0.05                     | 10                      | 89% ( $\pm$ 16%)          | 30% ( $\pm$ 7%)           |
| PFBS             | 0.01                     | 5                       | 97% ( $\pm$ 6%)           | 68% ( $\pm$ 18%)          |
| PFHxS            | 0.05                     | 5                       | 90% ( $\pm$ 6%)           | 100% ( $\pm$ 21%)         |
| PFOS             | 0.1                      | 1                       | 92% ( $\pm$ 9%)           | 70% ( $\pm$ 58%)          |
| 8:2 FTOH         | 5                        | nd                      | 65% ( $\pm$ 10%)          | nd                        |
| 6:2PAP           | 1                        | nd                      | 86% ( $\pm$ 9%)           | 20% ( $\pm$ 5%)           |
| 8:2PAP           | 0.5                      | nd                      | 92% ( $\pm$ 10%)          | 88% ( $\pm$ 23%)          |
| 6:2-6:2-diPAP    | 0.01                     | 50                      | 96% ( $\pm$ 14%)          | 40% ( $\pm$ 10%)          |
| 8:2-8:2-diPAP    | 0.01                     | 50                      | 50% ( $\pm$ 3%)           | 40% ( $\pm$ 15%)          |
| 6:2 FTCA         | 0.5                      | nd                      | 60% ( $\pm$ 4%)           | nd                        |
| 8:2 FTCA         | 0.5                      | nd                      | 60% ( $\pm$ 5%)           | nd                        |
| 10:2 FTCA        | 0.5                      | nd                      | 77% ( $\pm$ 14%)          | nd                        |
| 7-3 FTCA         | 0.1                      | nd                      | 45% ( $\pm$ 6%)           | nd                        |
| 5-3 FTCA         | 0.5                      | nd                      | 55% ( $\pm$ 10%)          | nd                        |
| 8:2 FTOH-Sulfate | 0.05                     | 5                       | 92% ( $\pm$ 10%)          | 89% ( $\pm$ 24%)          |

nd: not detected or not analyzed

**Table S.5: Results of p-values for Shapiro-Wilk normality test.** A  $p$ -value of 0.05 was chosen for statistical significance such as if  $p < 0.05$ , the null hypothesis  $H_0 =$  data follow a normal distribution, is rejected, and the data are unlikely to be normally distributed. If the test statistic is above 0.05 ( $p > 0.05$ ), the Shapiro-Wilk test can only conclude there is no evidence of non-normality (nd= not detected).

| Analyte          | Sample group       | Data without log transformation | Log transformed data |
|------------------|--------------------|---------------------------------|----------------------|
| PFBA             | General population | nd                              | nd                   |
|                  | Office workers     | nd                              | nd                   |
| PFPeA            | General population | <0.0001                         | <0.0001              |
|                  | Office workers     | <0.0001                         | <0.0001              |
| PFHxA            | General population | <0.0001                         | <0.0001              |
|                  | Office workers     | <0.0001                         | 0.0018               |
| PFHpA            | General population | <0.0001                         | <0.0001              |
|                  | Office workers     | <0.0001                         | <0.0001              |
| PFOA             | General population | <0.0001                         | <0.0001              |
|                  | Office workers     | 0.0557                          | <0.0001              |
| PFNA             | General population | <0.0001                         | 0.4717               |
|                  | Office workers     | 0.1481                          | 0.0088               |
| PFDA             | General population | <0.0001                         | 0.0187               |
|                  | Office workers     | <0.0001                         | 0.0073               |
| PFUnA            | General population | <0.0001                         | 0.1969               |
|                  | Office workers     | <0.0001                         | 0.1766               |
| PFDoA            | General population | <0.0001                         | <0.0001              |
|                  | Office workers     | <0.0001                         | <0.0001              |
| PFTriA           | General population | <0.0001                         | <0.0001              |
|                  | Office workers     | <0.0001                         | <0.0001              |
| PFTetA           | General population | <0.0001                         | <0.0001              |
|                  | Office workers     | <0.0001                         | <0.0001              |
| PFBS             | General population | <0.0001                         | <0.0001              |
|                  | Office workers     | <0.0001                         | 0.0002               |
| PFHxS            | General population | <0.0001                         | 0.0264               |
|                  | Office workers     | <0.0001                         | 0.0057               |
| PFOs             | General population | <0.0001                         | 0.0171               |
|                  | Office workers     | <0.0001                         | 0.1260               |
| 4:2 FTOH         | General population | nd                              | nd                   |
|                  | Office workers     | nd                              | nd                   |
| 6:2 FTOH         | General population | nd                              | nd                   |
|                  | Office workers     | nd                              | nd                   |
| 8:2 FTOH         | General population | nd                              | nd                   |
|                  | Office workers     | nd                              | nd                   |
| 10:2 FTOH        | General population | nd                              | nd                   |
|                  | Office workers     | nd                              | nd                   |
| 6:2PAP           | General population | nd                              | nd                   |
|                  | Office workers     | nd                              | nd                   |
| 8:2PAP           | General population | <0.0001                         | <0.0001              |
|                  | Office workers     | <0.0001                         | <0.0001              |
| 6:2-6:2-diPAP    | General population | <0.0001                         | <0.0001              |
|                  | Office workers     | <0.0001                         | <0.0001              |
| 8:2-8:2-diPAP    | General population | <0.0001                         | <0.0001              |
|                  | Office workers     | <0.0001                         | <0.0001              |
| 6:2 FTCA         | General population | nd                              | nd                   |
|                  | Office workers     | nd                              | nd                   |
| 8:2 FTCA         | General population | nd                              | nd                   |
|                  | Office workers     | nd                              | nd                   |
| 10:2 FTCA        | General population | nd                              | nd                   |
|                  | Office workers     | nd                              | nd                   |
| 7-3 FTCA         | General population | nd                              | nd                   |
|                  | Office workers     | nd                              | nd                   |
| 5-3 FTCA         | General population | nd                              | nd                   |
|                  | Office workers     | nd                              | nd                   |
| 8:2 FTOH-Sulfate | General population | <0.0001                         | <0.0001              |
|                  | Office workers     | <0.0001                         | <0.0001              |

**Table S.6: P-Values from Mann-Whitney U test** to compare concentration between General population and Office workers and for gender differences. A  $p$ -value of 0.05 was chosen for statistical significance such as if  $p > 0.05$ , the null hypothesis  $H_0$  = there is a significant difference between the two groups, is rejected. If  $p > 0.05$ ,  $H_0$  is rejected, there is no significant difference between the two groups of data. (nd= not detected)

| Analyte          | Comparison                           |                  |
|------------------|--------------------------------------|------------------|
|                  | General Population Vs Office workers | Males Vs Females |
| PFBA             | nd                                   | nd               |
| PFPeA            | 0.6088                               | 0.8370           |
| PFHxA            | <0.0001                              | 0.780            |
| PFHpA            | 0.8396                               | 0.1849           |
| PFOA             | 0.1228                               | 0.0073           |
| PFNA             | 0.0416                               | 0.1724           |
| PFDA             | 0.0002                               | 0.9840           |
| PFUnA            | 0.019                                | 0.3012           |
| PFDoA            | 0.6067                               | 0.5227           |
| PFTriA           | 0.0191                               | 0.7998           |
| PFTetA           | 0.9160                               | 0.8338           |
| PFBS             | <0.0001                              | 0.1577           |
| PFHxS            | 0.4188                               | <0.0001          |
| PFOS             | 0.2273                               | 0.0018           |
| 4:2 FTOH         | nd                                   | nd               |
| 6:2 FTOH         | nd                                   | nd               |
| 8:2 FTOH         | nd                                   | nd               |
| 10:2 FTOH        | nd                                   | nd               |
| 6:2PAP           | nd                                   | nd               |
| 8:2PAP           | nd                                   | nd               |
| 6:2-6:2-diPAP    | 0.3269                               | 0.2615           |
| 8:2-8:2-diPAP    | 0.8114                               | 0.3216           |
| 6:2 FTCA         | nd                                   | nd               |
| 8:2 FTCA         | nd                                   | nd               |
| 10:2 FTCA        | nd                                   | nd               |
| 7-3 FTCA         | nd                                   | nd               |
| 5-3 FTCA         | nd                                   | nd               |
| 8:2 FTOH-Sulfate | 0.8112                               | 0.6910           |



Figure S.2 Metabolites of 8:2 FTOH in serum

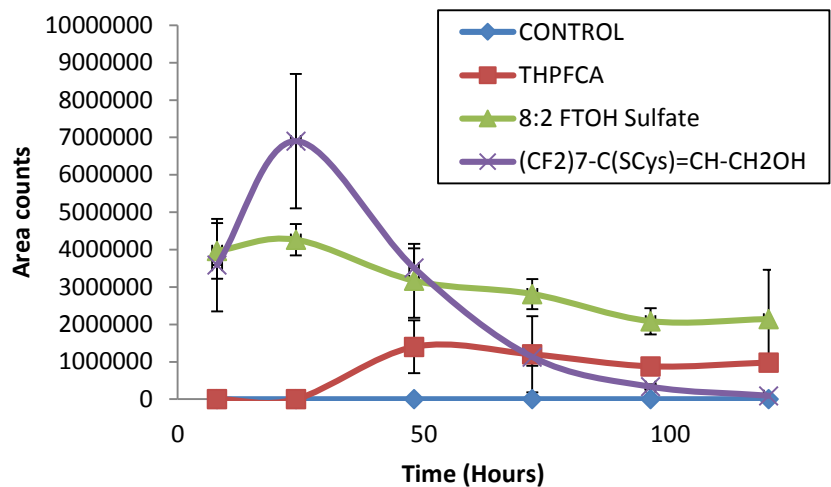

Mean area counts and standard deviation from serum samples of 8:2 FTOH dosed rat for the potential metabolites THPFCA, 8:2 FTOH sulfate and FTOH cysteine ((CF2)7-C(SCys)=CH-CH2OH)).

Figure S.3. Mass profiler of 8:2 FTOH dosed animal serum

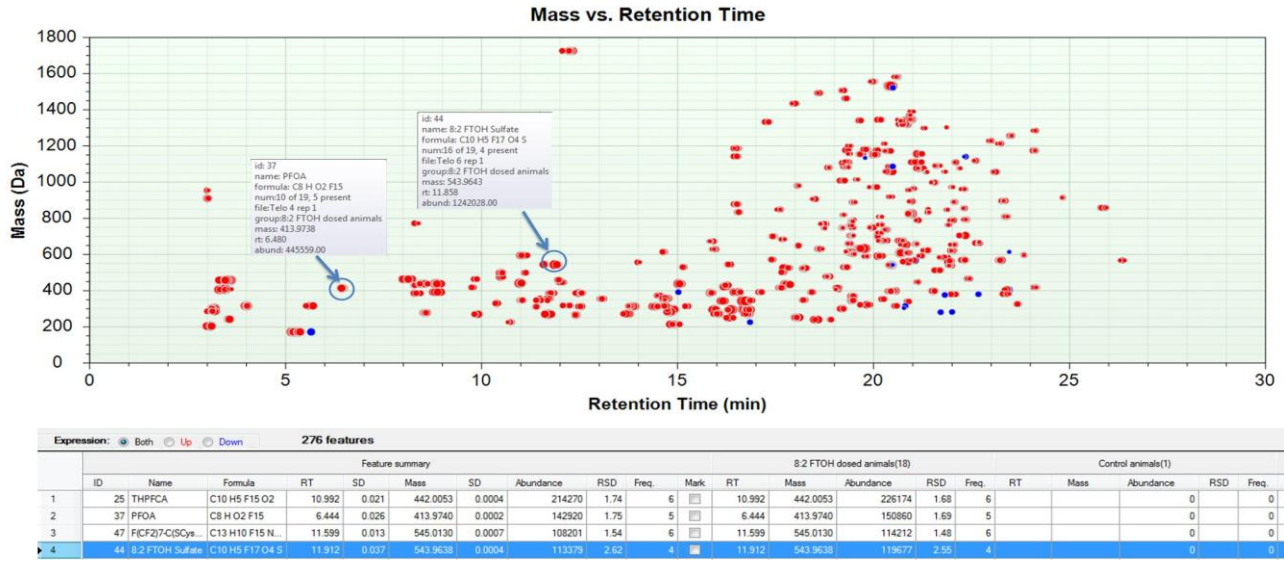

Plots comparing lists of compounds present in 8:2 FTOH dosed serum samples, and Control samples. Figure is obtained with Mass Profiler software. Blue dots represent compounds that are present in Control only, red dots compounds that are present in Dosed serum only. Size of dots is proportional to abundance of the compound. The table below summarizes only a small portion in the scroll bar of the list of all features proposed formulae as well as score and database identification.

Figure S.4. Mass profiler of 8:2 diPAP dosed animal serum

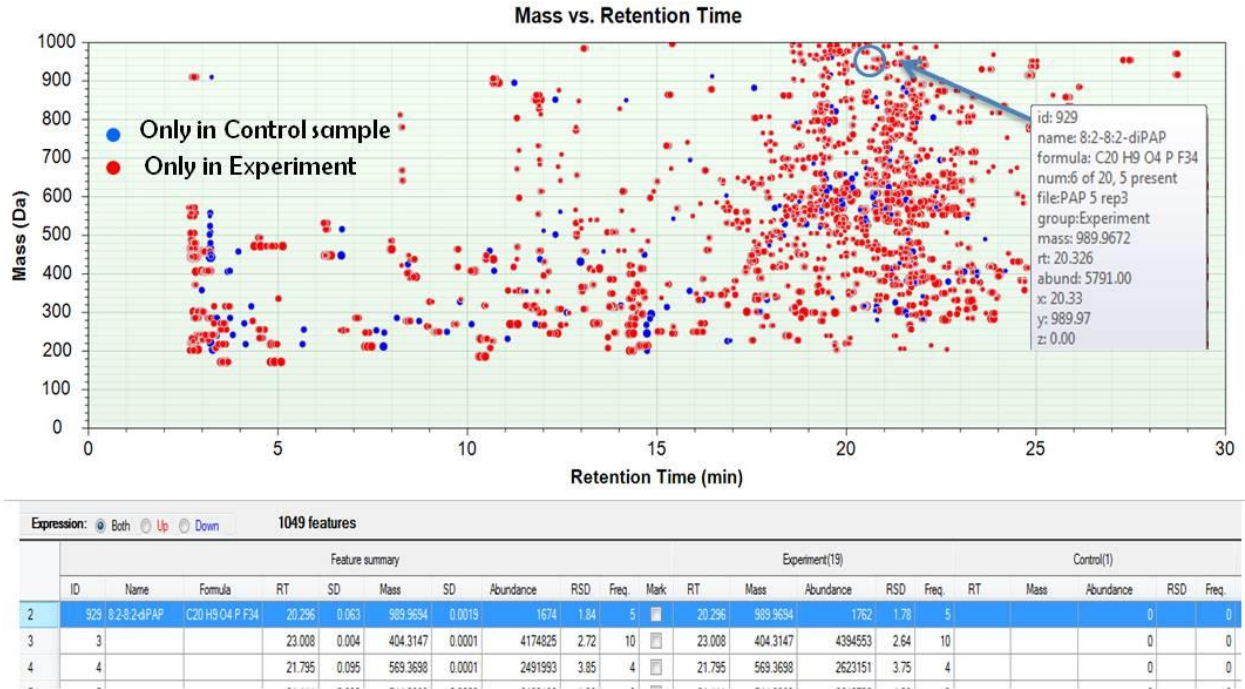

Plots comparing features present in 8:2 diPAP dosed serum samples, and Control samples. Figure is obtained with Mass Profiler software. Blue dots represent compounds that are present in Control only, red dots compounds that are present in Dosed serum only. Size of dots is proportional to abundance of the compound. Table below summarizes the list all features as well as their matching to score to the database identification.



### Figure S.5. Feces analysis

Upper panel: Arithmetic mean  $\pm$  SD for the concentration of the 8:2 FTOH and its expected biotransformation products in serum, urine and feces of the animals dosed with 5 mg/kg of 8:2 FTOH. Lower panel: Arithmetic mean  $\pm$  SD for the concentration of the 8:2 diPAP and its expected biotransformation products in serum, urine and feces of the animals dosed with 5 mg/kg of 8:2 diPAP.

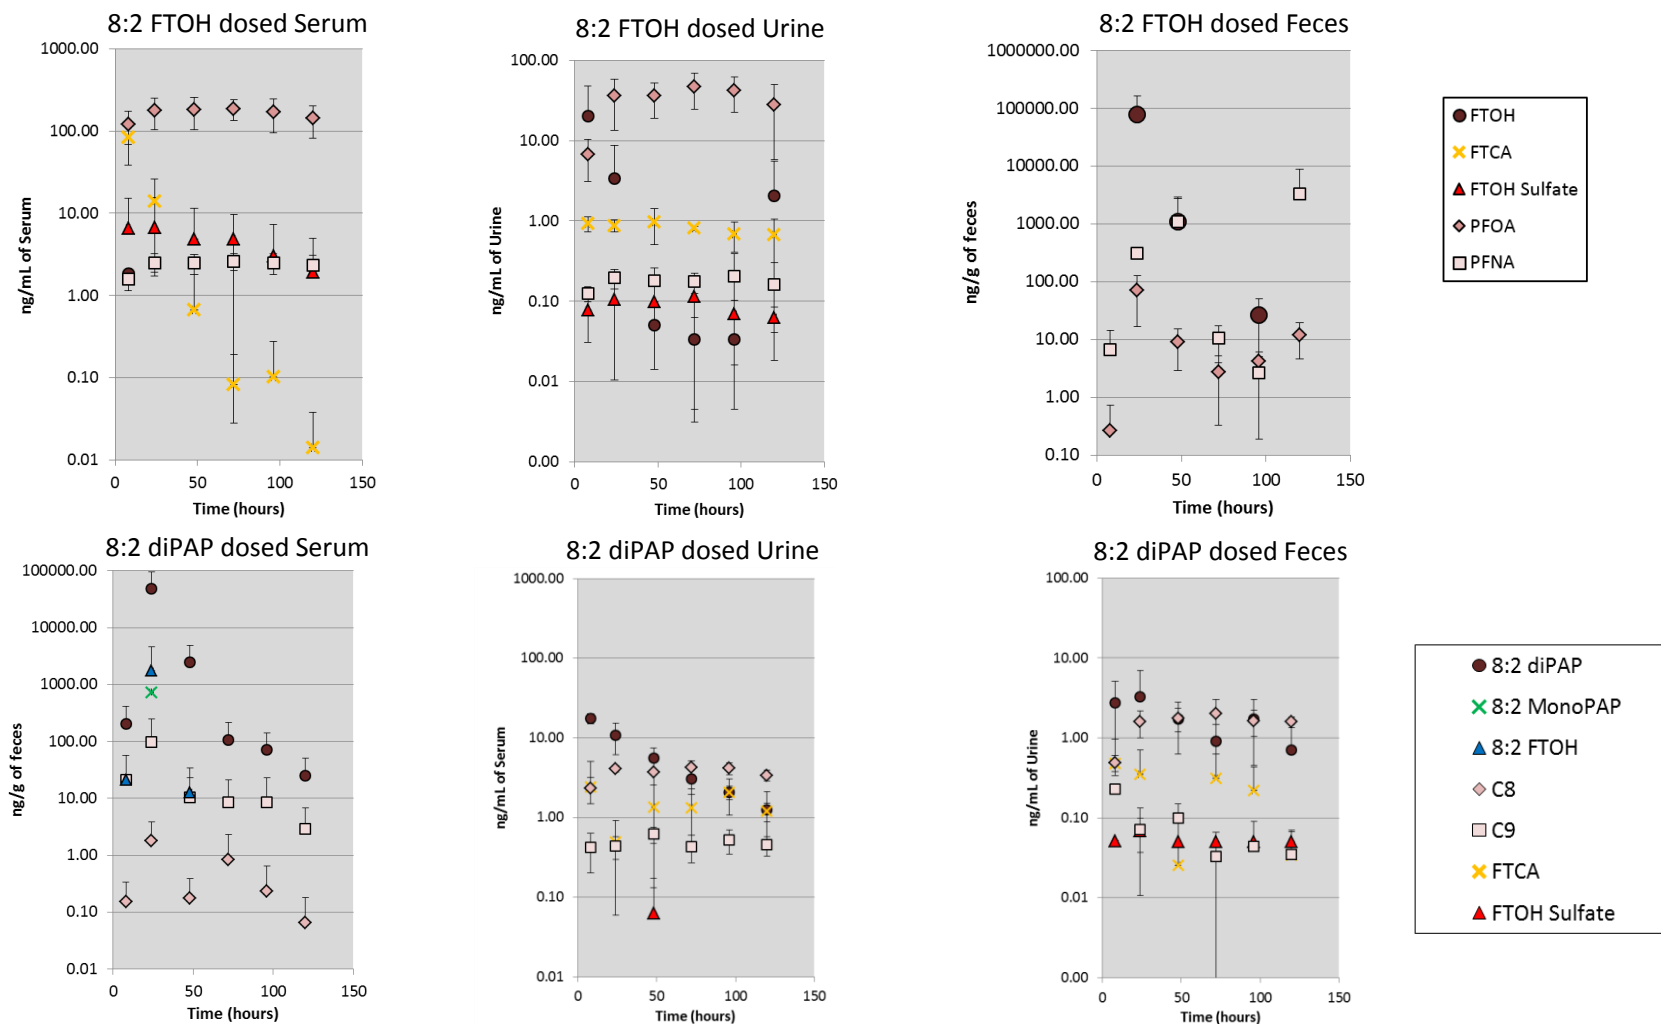

Figure S.6. Plots for Spearman correlation of analysis of selected compounds in the office workers from the present study and the analysis from previous work <sup>5</sup>.

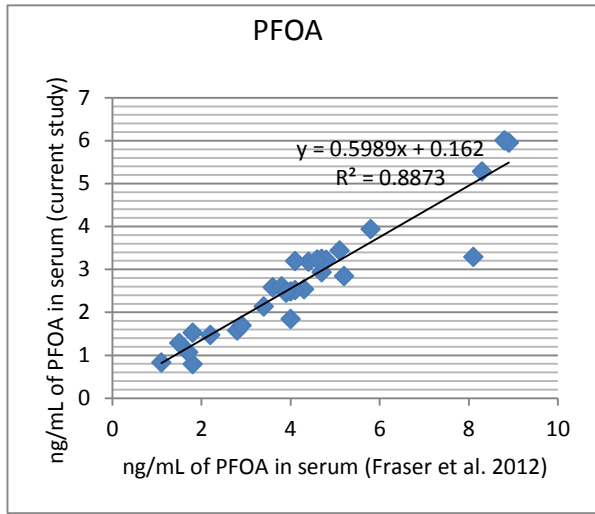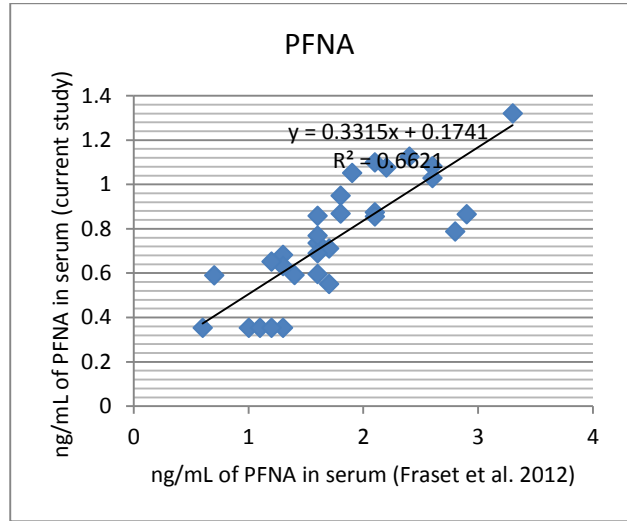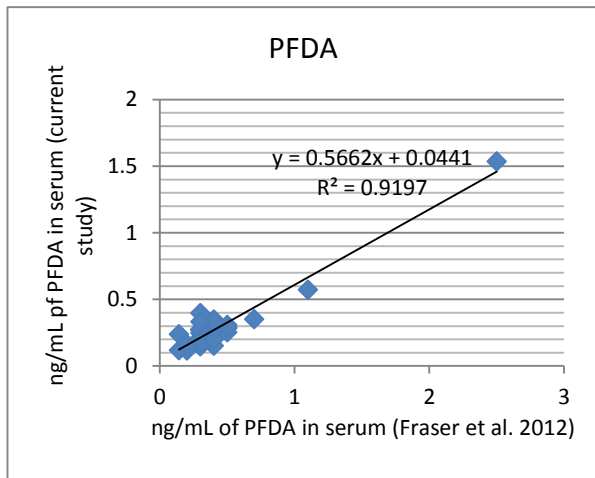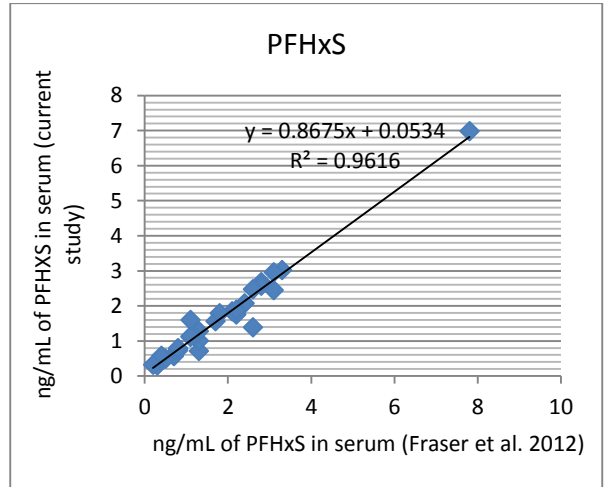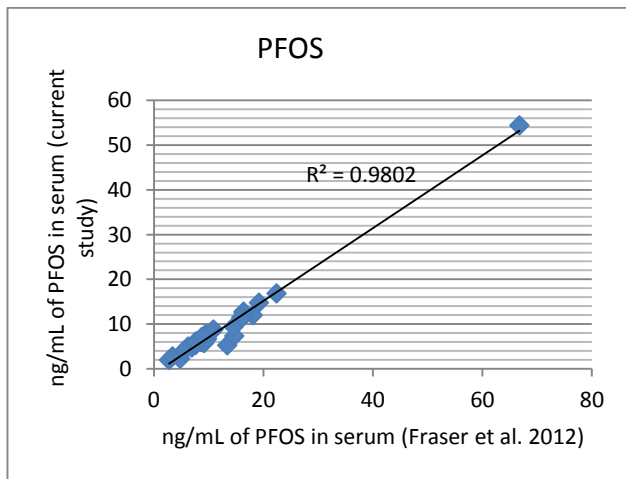

**Figure S.7 8:2 FTOH sulfate in human serum**

Upper panel, extracted ion chromatogram (EIC) of spiked calf serum with the 8:2 FTOH sulfate standard (green) and the 8:2 FTOH sulfate measured in human serum sample (pink). Lower panel, spectra of selected compound in human serum after background subtractions. Table indicates results of identification software for the selected spectra, FTOH sulfate is highlighted in yellow and show a 47.37% probability of match.

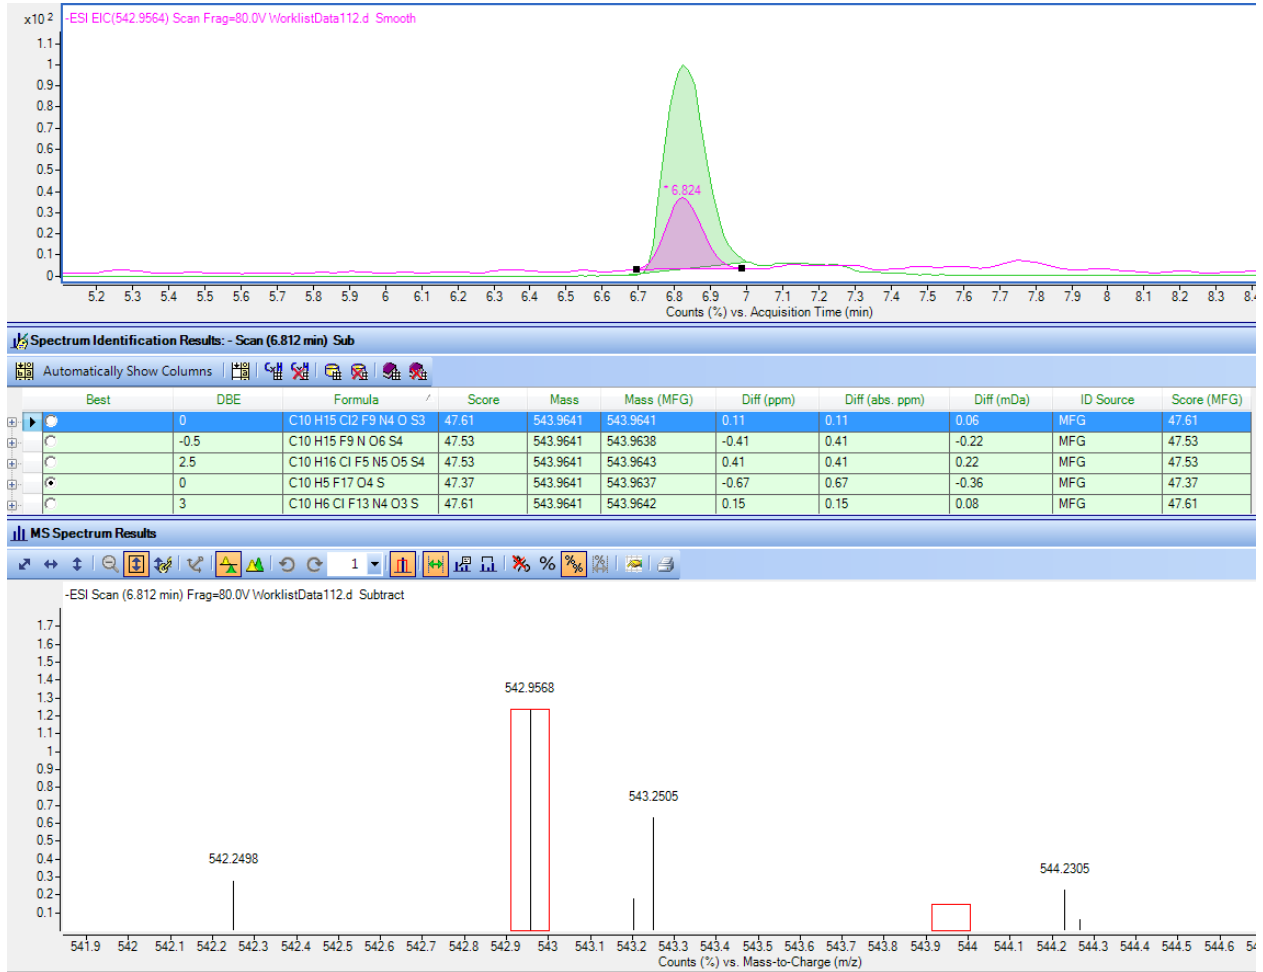

**Figure S.8 Extracted Ion Chromatogram for FTOH Sulfate in blanks and standard curve points.**

Sample analysis of human samples was divided in 2 batches, results of a selection of blanks and standard curve points for each batch are represented here. EIC of lower and higher calibration curve points are set as a visual reference. Method blank is obtained by extracting DI water with the same procedure as for the serum sample. Matrix blank is obtained by extracting blank calf serum with the same procedure as for the serum samples. Instrumental blanks are added to the run every 4 samples.

**Batch 1**

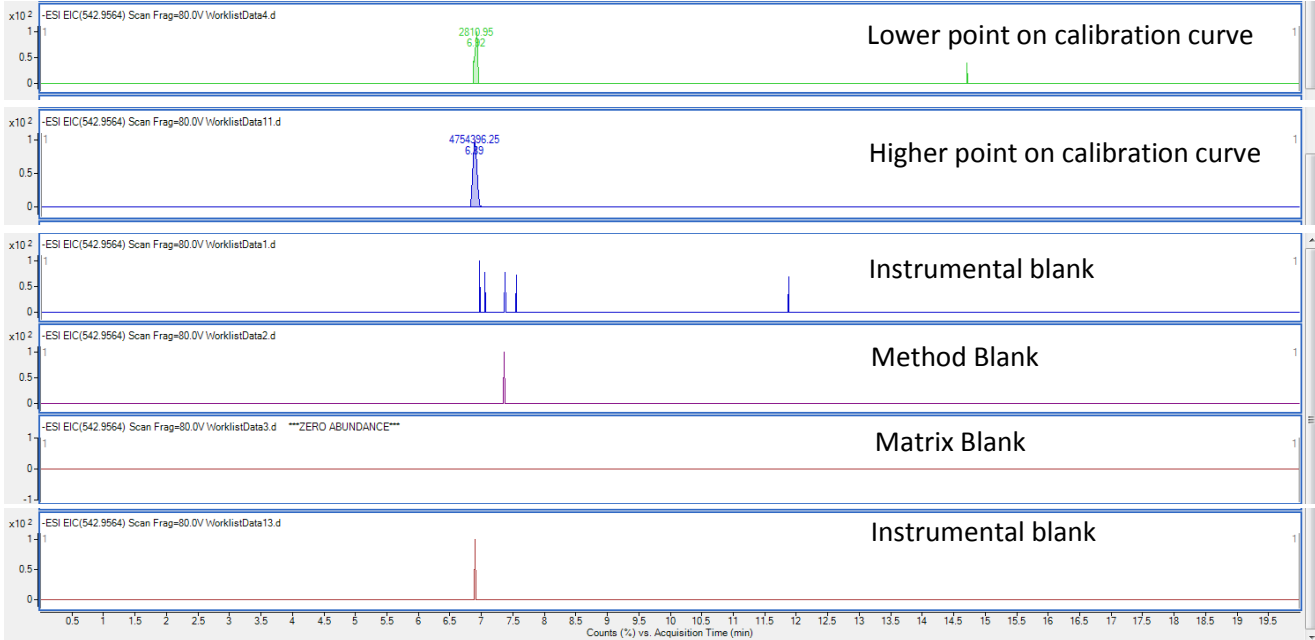

**Batch 2**

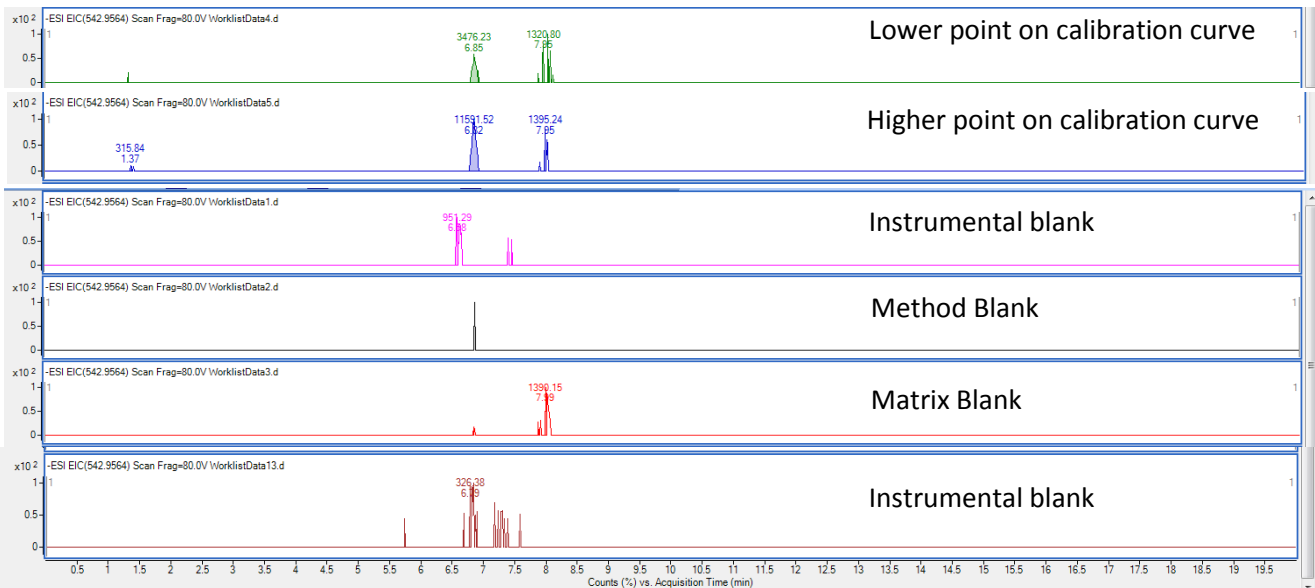

## References

1. D'Eon J, C.; Mabury, S. A., Exploring indirect sources of human exposure to perfluoroalkyl carboxylates (PFCAs): Evaluating uptake, elimination, and biotransformation of polyfluoroalkyl phosphate esters (PAPs) in the rat. *Environ. Health Perspect.* **2011**, 119, (3), 344-50.
2. Fasano, W. J.; Carpenter, S. C.; Gannon, S. A.; Snow, T. A.; Stadler, J. C.; Kennedy, G. L.; Buck, R. C.; Korzeniowski, S. H.; Hinderliter, P. M.; Kemper, R. A., Absorption, distribution, metabolism, and elimination of 8-2 fluorotelomer alcohol in the rat. *Toxicol. Sci.* **2006**, 91, (2), 341-55.
3. Fasano, W. J.; Sweeney, L. M.; Mawn, M. P.; Nabb, D. L.; Szostek, B.; Buck, R. C.; Gargas, M. L., Kinetics of 8-2 fluorotelomer alcohol and its metabolites, and liver glutathione status following daily oral dosing for 45 days in male and female rats. *Chem. Biol. Interact.* 2009, 180, (2), 281-95.
4. Martin, M. T.; Brennan, R. J.; Hu, W.; Ayanoglu, E.; Lau, C.; Ren, H.; Wood, C. R.; Corton, J. C.; Kavlock, R. J.; Dix, D. J., Toxicogenomic study of triazole fungicides and perfluoroalkyl acids in rat livers predicts toxicity and categorizes chemicals based on mechanisms of toxicity. *Toxicol. Sci.* **2007**, 97, (2), 595-613.
5. Fraser, A. J.; Webster, T. F.; Watkins, D. J.; Nelson, J. W.; Stapleton, H. M.; Calafat, A. M.; Kato, K.; Shoeib, M.; Vieira, V. M.; McClean, M. D., Polyfluorinated compounds in serum linked to indoor air in office environments. *Environ. Sci. Technol.* **2012**, 46, (2), 1209-15.
